# Supplementary material
Source: ML conference proceedings conference paper supplement (https://proceedings.neurips.cc/paper_files/paper/2021/hash/ae78510109d46b0a6eef9820a4ca95d6-Abstract.html)
Supplement: Supplementary file 1 [file ae78510109d46b0a6eef9820a4ca95d6-Supplemental.zip]

Archive with 85 entries (58 files):
- supplementary/
- supplementary/.DS_Store
- __MACOSX/
- __MACOSX/supplementary/
- __MACOSX/supplementary/._.DS_Store
- supplementary/TestRank_light/
- supplementary/TestRank_light/checkpoint/
- supplementary/TestRank_light/checkpoint/.DS_Store
- __MACOSX/supplementary/TestRank_light/
- __MACOSX/supplementary/TestRank_light/checkpoint/
- __MACOSX/supplementary/TestRank_light/checkpoint/._.DS_Store
- supplementary/TestRank_light/checkpoint/stl10/
- supplementary/TestRank_light/checkpoint/stl10/.DS_Store
- __MACOSX/supplementary/TestRank_light/checkpoint/stl10/
- __MACOSX/supplementary/TestRank_light/checkpoint/stl10/._.DS_Store
- supplementary/TestRank_light/checkpoint/stl10/ckpt_bias/
- supplementary/TestRank_light/checkpoint/stl10/ckpt_bias/biased_dataset/
- supplementary/TestRank_light/checkpoint/stl10/ckpt_bias/biased_dataset/0/
- supplementary/TestRank_light/checkpoint/stl10/ckpt_bias/biased_dataset/0/val.npy
- __MACOSX/supplementary/TestRank_light/checkpoint/stl10/ckpt_bias/
- __MACOSX/supplementary/TestRank_light/checkpoint/stl10/ckpt_bias/biased_dataset/
- __MACOSX/supplementary/TestRank_light/checkpoint/stl10/ckpt_bias/biased_dataset/0/
- __MACOSX/supplementary/TestRank_light/checkpoint/stl10/ckpt_bias/biased_dataset/0/._val.npy
- supplementary/TestRank_light/checkpoint/stl10/ckpt_bias/biased_dataset/0/train.npy
- __MACOSX/supplementary/TestRank_light/checkpoint/stl10/ckpt_bias/biased_dataset/0/._train.npy
- supplementary/TestRank_light/checkpoint/stl10/ckpt_bias/biased_dataset/1/
- supplementary/TestRank_light/checkpoint/stl10/ckpt_bias/biased_dataset/1/val.npy
- __MACOSX/supplementary/TestRank_light/checkpoint/stl10/ckpt_bias/biased_dataset/1/
- __MACOSX/supplementary/TestRank_light/checkpoint/stl10/ckpt_bias/biased_dataset/1/._val.npy
- supplementary/TestRank_light/checkpoint/stl10/ckpt_bias/biased_dataset/1/train.npy
- __MACOSX/supplementary/TestRank_light/checkpoint/stl10/ckpt_bias/biased_dataset/1/._train.npy
- supplementary/TestRank_light/checkpoint/stl10/ckpt_bias/biased_dataset/2/
- supplementary/TestRank_light/checkpoint/stl10/ckpt_bias/biased_dataset/2/val.npy
- __MACOSX/supplementary/TestRank_light/checkpoint/stl10/ckpt_bias/biased_dataset/2/
- __MACOSX/supplementary/TestRank_light/checkpoint/stl10/ckpt_bias/biased_dataset/2/._val.npy
- supplementary/TestRank_light/checkpoint/stl10/ckpt_bias/biased_dataset/2/train.npy
- __MACOSX/supplementary/TestRank_light/checkpoint/stl10/ckpt_bias/biased_dataset/2/._train.npy
- supplementary/TestRank_light/environment.yml
- __MACOSX/supplementary/TestRank_light/._environment.yml
- supplementary/TestRank_light/mymodels/
- supplementary/TestRank_light/mymodels/__init__.py
- __MACOSX/supplementary/TestRank_light/mymodels/
- __MACOSX/supplementary/TestRank_light/mymodels/.___init__.py
- supplementary/TestRank_light/mymodels/__pycache__/
- supplementary/TestRank_light/mymodels/__pycache__/small_resnet.cpython-37.pyc
- __MACOSX/supplementary/TestRank_light/mymodels/__pycache__/
- __MACOSX/supplementary/TestRank_light/mymodels/__pycache__/._small_resnet.cpython-37.pyc
- supplementary/TestRank_light/mymodels/__pycache__/small_resnet.cpython-36.pyc
- __MACOSX/supplementary/TestRank_light/mymodels/__pycache__/._small_resnet.cpython-36.pyc
- supplementary/TestRank_light/mymodels/__pycache__/resnet.cpython-37.pyc
- __MACOSX/supplementary/TestRank_light/mymodels/__pycache__/._resnet.cpython-37.pyc
- supplementary/TestRank_light/mymodels/__pycache__/resnet.cpython-36.pyc
- __MACOSX/supplementary/TestRank_light/mymodels/__pycache__/._resnet.cpython-36.pyc
- supplementary/TestRank_light/mymodels/__pycache__/wideresnet.cpython-36.pyc
- __MACOSX/supplementary/TestRank_light/mymodels/__pycache__/._wideresnet.cpython-36.pyc
- supplementary/TestRank_light/mymodels/__pycache__/wideresnet.cpython-37.pyc
- __MACOSX/supplementary/TestRank_light/mymodels/__pycache__/._wideresnet.cpython-37.pyc
- supplementary/TestRank_light/mymodels/__pycache__/__init__.cpython-36.pyc
- __MACOSX/supplementary/TestRank_light/mymodels/__pycache__/.___init__.cpython-36.pyc
- supplementary/TestRank_light/mymodels/__pycache__/__init__.cpython-37.pyc
- __MACOSX/supplementary/TestRank_light/mymodels/__pycache__/.___init__.cpython-37.pyc
- supplementary/TestRank_light/mymodels/resnet.py
- __MACOSX/supplementary/TestRank_light/mymodels/._resnet.py
- supplementary/TestRank_light/mymodels/wideresnet.py
- __MACOSX/supplementary/TestRank_light/mymodels/._wideresnet.py
- supplementary/TestRank_light/run.sh
- __MACOSX/supplementary/TestRank_light/._run.sh
- supplementary/TestRank_light/README.md
- __MACOSX/supplementary/TestRank_light/._README.md
- supplementary/TestRank_light/byol/
- supplementary/TestRank_light/byol/checkpoints/
- supplementary/TestRank_light/byol/checkpoints/official-stl10/
- supplementary/TestRank_light/mcp.py
- __MACOSX/supplementary/TestRank_light/._mcp.py
- supplementary/TestRank_light/utils.py
- __MACOSX/supplementary/TestRank_light/._utils.py
- supplementary/TestRank_light/dsa.py
- __MACOSX/supplementary/TestRank_light/._dsa.py
- supplementary/TestRank_light/selection.py
- __MACOSX/supplementary/TestRank_light/._selection.py
- supplementary/TestRank_light/train_classifier.py
- __MACOSX/supplementary/TestRank_light/._train_classifier.py
- supplementary/TestRank_light/save/
- supplementary/paper_and_appendix.pdf
- __MACOSX/supplementary/._paper_and_appendix.pdf
