# Supplementary material
Source: ML conference proceedings conference paper supplement (https://proceedings.neurips.cc/paper_files/paper/2021/hash/ae78510109d46b0a6eef9820a4ca95d6-Abstract.html)
Supplement: Supplementary file 1 [file ae78510109d46b0a6eef9820a4ca95d6-Supplemental.zip › supplementary/TestRank_light/environment.yml]

name: gnn
channels:
  - pytorch
  - defaults
dependencies:
  - _libgcc_mutex=0.1=main
  - _pytorch_select=0.2=gpu_0
  - _tflow_select=2.3.0=mkl
  - absl-py=0.11.0=pyhd3eb1b0_1
  - aiohttp=3.6.3=py37h7b6447c_0
  - astor=0.8.1=py37h06a4308_0
  - async-timeout=3.0.1=py37h06a4308_0
  - attrs=20.3.0=pyhd3eb1b0_0
  - blas=1.0=mkl
  - blinker=1.4=py37h06a4308_0
  - brotlipy=0.7.0=py37h27cfd23_1003
  - bzip2=1.0.8=h7b6447c_0
  - c-ares=1.17.1=h27cfd23_0
  - ca-certificates=2021.1.19=h06a4308_0
  - cachetools=4.2.1=pyhd3eb1b0_0
  - cairo=1.14.12=h8948797_3
  - certifi=2020.12.5=py37h06a4308_0
  - cffi=1.14.4=py37h261ae71_0
  - chardet=3.0.4=py37h06a4308_1003
  - click=7.1.2=pyhd3eb1b0_0
  - coverage=5.4=py37h27cfd23_2
  - cryptography=3.3.1=py37h3c74f83_1
  - cudatoolkit=10.2.89=hfd86e86_1
  - ffmpeg=4.0=hcdf2ecd_0
  - fontconfig=2.13.0=h9420a91_0
  - freeglut=3.0.0=hf484d3e_5
  - freetype=2.10.4=h5ab3b9f_0
  - gast=0.2.2=py37_0
  - glib=2.66.1=h92f7085_0
  - google-auth=1.24.0=pyhd3eb1b0_0
  - google-auth-oauthlib=0.4.2=pyhd3eb1b0_2
  - google-pasta=0.2.0=py_0
  - graphite2=1.3.14=h23475e2_0
  - grpcio=1.35.0=py37hce63b2e_0
  - harfbuzz=1.8.8=hffaf4a1_0
  - hdf5=1.10.2=hba1933b_1
  - icu=58.2=he6710b0_3
  - idna=2.10=pyhd3eb1b0_0
  - intel-openmp=2020.2=254
  - jasper=2.0.14=h07fcdf6_1
  - jpeg=9b=h024ee3a_2
  - keras=2.3.1=0
  - keras-applications=1.0.8=py_1
  - keras-base=2.3.1=py37_0
  - keras-preprocessing=1.1.2=pyhd3eb1b0_0
  - lcms2=2.11=h396b838_0
  - ld_impl_linux-64=2.33.1=h53a641e_7
  - libedit=3.1.20191231=h14c3975_1
  - libffi=3.3=he6710b0_2
  - libgcc-ng=9.1.0=hdf63c60_0
  - libgfortran-ng=7.3.0=hdf63c60_0
  - libglu=9.0.0=hf484d3e_1
  - libopencv=3.4.2=hb342d67_1
  - libopus=1.3.1=h7b6447c_0
  - libpng=1.6.37=hbc83047_0
  - libprotobuf=3.14.0=h8c45485_0
  - libstdcxx-ng=9.1.0=hdf63c60_0
  - libtiff=4.1.0=h2733197_1
  - libuuid=1.0.3=h1bed415_2
  - libuv=1.40.0=h7b6447c_0
  - libvpx=1.7.0=h439df22_0
  - libxcb=1.14=h7b6447c_0
  - libxml2=2.9.10=hb55368b_3
  - lz4-c=1.9.2=heb0550a_3
  - markdown=3.3.3=py37h06a4308_0
  - mkl=2020.2=256
  - mkl-service=2.3.0=py37he8ac12f_0
  - mkl_fft=1.2.0=py37h23d657b_0
  - mkl_random=1.1.1=py37h0573a6f_0
  - multidict=4.7.6=py37h7b6447c_1
  - ncurses=6.2=he6710b0_1
  - ninja=1.10.2=py37hff7bd54_0
  - numpy=1.19.2=py37h54aff64_0
  - numpy-base=1.19.2=py37hfa32c7d_0
  - oauthlib=3.1.0=py_0
  - olefile=0.46=py37_0
  - opencv=3.4.2=py37h6fd60c2_1
  - openssl=1.1.1i=h27cfd23_0
  - opt_einsum=3.1.0=py_0
  - pcre=8.44=he6710b0_0
  - pip=20.3.3=py37h06a4308_0
  - pixman=0.40.0=h7b6447c_0
  - py-opencv=3.4.2=py37hb342d67_1
  - pyasn1=0.4.8=py_0
  - pycparser=2.20=py_2
  - pyjwt=1.7.1=py37_0
  - pyopenssl=20.0.1=pyhd3eb1b0_1
  - pysocks=1.7.1=py37_1
  - python=3.7.9=h7579374_0
  - pytorch=1.7.1=py3.7_cuda10.2.89_cudnn7.6.5_0
  - pyyaml=5.4.1=py37h27cfd23_1
  - readline=8.0=h7b6447c_0
  - requests-oauthlib=1.3.0=py_0
  - rsa=4.7=pyhd3eb1b0_1
  - setuptools=51.0.0=py37h06a4308_2
  - six=1.15.0=py37h06a4308_0
  - sqlite=3.33.0=h62c20be_0
  - tensorflow=2.1.0=mkl_py37h80a91df_0
  - tensorflow-base=2.1.0=mkl_py37h6d63fb7_0
  - tensorflow-estimator=2.1.0=pyhd54b08b_0
  - termcolor=1.1.0=py37h06a4308_1
  - tk=8.6.10=hbc83047_0
  - torchaudio=0.7.2=py37
  - torchvision=0.8.2=py37_cu102
  - typing_extensions=3.7.4.3=py_0
  - werkzeug=1.0.1=pyhd3eb1b0_0
  - wheel=0.36.2=pyhd3eb1b0_0
  - wrapt=1.12.1=py37h7b6447c_1
  - xz=5.2.5=h7b6447c_0
  - yaml=0.2.5=h7b6447c_0
  - yarl=1.6.3=py37h27cfd23_0
  - zipp=3.4.0=pyhd3eb1b0_0
  - zlib=1.2.11=h7b6447c_3
  - zstd=1.4.5=h9ceee32_0
  - pip:
    - ase==3.20.1
    - brewer2mpl==1.4.1
    - byol-pytorch==0.5.2
    - cycler==0.10.0
    - decorator==4.4.2
    - future==0.18.2
    - googledrivedownloader==0.4
    - h5py==2.10.0
    - importlib-metadata==3.4.0
    - isodate==0.6.0
    - jinja2==2.11.2
    - joblib==0.16.0
    - kiwisolver==1.2.0
    - llvmlite==0.34.0
    - markupsafe==1.1.1
    - matplotlib==3.3.1
    - networkx==2.5
    - numba==0.51.2
    - onnx==1.8.1
    - onnx2keras==0.0.24
    - pandas==1.1.2
    - pillow==8.1.0
    - protobuf==3.13.0
    - pyasn1-modules==0.2.8
    - pyparsing==2.4.7
    - python-dateutil==2.8.1
    - python-louvain==0.15
    - pytorch2keras==0.2.4
    - pytz==2020.1
    - rdflib==5.0.0
    - requests==2.24.0
    - scikit-learn==0.23.2
    - scipy==1.5.2
    - tb-nightly==2.5.0a20210130
    - tensorboard==2.1.1
    - tensorboard-plugin-wit==1.8.0
    - tensorboardx==2.1
    - threadpoolctl==2.1.0
    - torch-cluster==1.5.8
    - torch-geometric==1.6.3
    - torch-scatter==2.0.5
    - torch-sparse==0.6.8
    - torch-spline-conv==1.2.0
    - tqdm==4.48.2
    - urllib3==1.25.10
prefix: /research/dept2/yuli/install/envs/gnn
