# Supplementary material
Source: ML conference proceedings conference paper supplement (https://proceedings.neurips.cc/paper_files/paper/2021/hash/ae78510109d46b0a6eef9820a4ca95d6-Abstract.html)
Supplement: Supplementary file 1 [file ae78510109d46b0a6eef9820a4ca95d6-Supplemental.zip › supplementary/TestRank_light/mymodels/__init__.py]

from .resnet import *
from .wideresnet import *
