# Supplementary material
Source: ML conference proceedings conference paper supplement (https://proceedings.neurips.cc/paper_files/paper/2021/hash/ae78510109d46b0a6eef9820a4ca95d6-Abstract.html)
Supplement: Supplementary file 1 [file ae78510109d46b0a6eef9820a4ca95d6-Supplemental.zip › supplementary/TestRank_light/train_classifier.py]

import argparse
import os, sys 


import torch
import torch.nn as nn
import torch.nn.functional as F
import torch.optim as optim
import torchvision.models as models
import torchvision
import torchvision.transforms as transforms
from PIL import Image
from matplotlib import pyplot as plt

import random
import numpy as np
import mymodels
import utils
import data     
import ast 
from datetime import date
import copy

today = date.today()
device = torch.device("cuda:0" if torch.cuda.is_available() else 'cpu')
print ("Use device: ", device)

img_channels = {
    'cifar10':3,
    'svhn': 3,
    'stl10': 3
}

start_epoch = 0  # start from epoch 0 or last checkpoint epoch
train_acc = 0.0
best_acc = 0.0

# train   
def train(epoch, net, trainloader, criterion, optimizer):
    global train_acc
    net.train()
    total = 0
    correct = 0
    train_loss = 0
    
    for batch_idx, data in enumerate(trainloader):
        inputs, labels = data
        inputs, labels = inputs.to(device), labels.to(device)
        optimizer.zero_grad()

        outputs, _ = net(inputs)

        loss = criterion(outputs, labels)
        loss.backward()
        optimizer.step()

        _, predicted = outputs.max(1)

        correct += predicted.eq(labels).sum().item()
        train_loss += loss.item()
        total += labels.size(0)

        print ("Epoch [%d] Train Batch [%d/%d]"%(epoch, batch_idx, len(trainloader)), 'Loss: %.3f | Acc: %.3f(%d/%d)'
                                % (train_loss/(batch_idx+1), 100.*correct/total, correct, total))

    train_acc = 100.*correct/total


# test
def test(epoch, net, testloader, criterion, model_save_path):
    global best_acc
    net.eval()
    total = 0
    correct = 0
    test_loss = 0
    for batch_idx, data in enumerate(testloader):
        inputs, labels = data
        inputs, labels = inputs.to(device), labels.to(device)

        outputs, _ = net(inputs)
        loss = criterion(outputs, labels)

        _, pred = outputs.max(1)
        total += labels.size(0)
        test_loss += loss.item()

        correct += pred.eq(labels).sum().item()

        print ("Test Batch [%d/%d]"%(batch_idx, len(testloader)), 'Loss: %.3f | Acc: %.3f(%d/%d)'
                                % (test_loss/(batch_idx+1), 100.*correct/total, correct, total))

    # Save checkpoint.
    test_acc = 100.*correct/total
    if test_acc > best_acc and (model_save_path is not None):
        print('Saving..')
        if device == 'cuda':
            state = net.module.state_dict()
        else:
            state = net.state_dict()
        state = {
            'net': state,
            'acc': test_acc,
            'epoch': epoch,
        }
        torch.save(state, model_save_path)
        best_acc = test_acc
    return test_acc


def set_weights_for_classes(dataset, weight_per_class):                                                                           
    # weight_per_class = np.random.rand(nclasses)
    print ("weight per class: ", weight_per_class)                                                 
    weight = [0] * len(dataset)     
    for idx, (img, label) in enumerate(dataset):    
        # print ('assign weigh {} / {}'.format(idx, len(dataset)))                                      
        weight[idx] = weight_per_class[label]                                  
    return weight  


def main():
    global data_segmentation

    parser = argparse.ArgumentParser("Train a classifier.")
    parser.add_argument("--dataset", type=str, default=None, 
                        help="supportive dataset: (cifar10, stl10)")
    parser.add_argument("--model", type=str, default=None, 
                        help="(resnet18, resnet50)")
    parser.add_argument("--batch_size", type=int, default=256, help="batch size")
    parser.add_argument("--num_workers", type=int, default=8, help="number of workers")
    # parser.add_argument("--img_size", type=int, default=224, help="batch size")
    parser.add_argument("--n_epochs", type=int, default=200, 
                        help="number of epochs of training")
    parser.add_argument("--class_weight", type=int, default=0, 
                         help='choose from three different settings: all ones, random 1, random 2')
    parser.add_argument("--pretrained", action="store_true", default=False, 
                        help="if we are to use the imagenet pretrained model or not")
    parser.add_argument("--data_root", type=str, help="dataset directory")
    parser.add_argument("--save_path", type=str, help="log save directory")
    parser.add_argument('--manualSeed', type=int, default=None, help='manual seed')

    args = parser.parse_args()
    print (args)

    # Give a random seed if no manual configuration
    if args.manualSeed is None:
        args.manualSeed = random.randint(1, 10000)
    random.seed(args.manualSeed)
    torch.manual_seed(args.manualSeed)
    np.random.seed(args.manualSeed)
    if device == 'cuda':
        torch.cuda.manual_seed(args.manualSeed)

    print (args.manualSeed)
    if not os.path.exists(args.save_path):
        os.makedirs(args.save_path)
    log = open(
        os.path.join(args.save_path,
                        'log_train_classifier_seed_{}.txt'.format(args.manualSeed)), 'w')
                        
    data_dir = os.path.join(args.data_root, args.dataset)

    # num of classes
    num_class_config = {'stl10':10, 'cifar10':10, 'cifar100':100, 'gtsrb':43, 'tinyimagenet':200, 'svhn':10, 'emnist':47}
    num_classes = num_class_config[args.dataset]

    # weight per class
    if args.dataset == 'cifar10' or args.dataset == 'svhn' or args.dataset == 'stl10':
        weight_per_class_1ist = [np.ones(num_classes), 
                             np.array([0.77132064, 0.02075195, 0.63364823, 0.74880388, 0.49850701,
                                    0.22479665, 0.19806286, 0.76053071, 0.16911084, 0.08833981]), 
                             np.array([0.68535982, 0.95339335, 0.00394827, 0.51219226, 0.81262096,
                                    0.61252607, 0.72175532, 0.29187607, 0.91777412, 0.71457578])]
    else:
        raise ValueError("Dataset not supported by current version")

    weight_per_class = weight_per_class_1ist[args.class_weight]

    # ---- load datasets -----
    if args.dataset == "svhn":
        train_transform = transforms.Compose([
            transforms.RandomHorizontalFlip(),
            transforms.RandomCrop(32, padding=4),
            transforms.ToTensor(),
            transforms.Normalize((0.5, 0.5, 0.5), (0.5, 0.5, 0.5))
        ])
        val_transform = transforms.Compose(
            [transforms.Resize((32, 32)),
             transforms.ToTensor(),
             transforms.Normalize((0.5, 0.5, 0.5), (0.5, 0.5, 0.5))
             ])
        
        # train and val set for classifier are both coming from the offical train set 
        train_set = torchvision.datasets.SVHN(root=data_dir, 
                                                split = 'train',
                                                transform=train_transform, 
                                                download=True)        
        val_set = torchvision.datasets.SVHN(root=data_dir, 
                                                split='train',
                                                transform=val_transform, 
                                                download=True)
        # print (min(train_set.labels), max(train_set.labels))
        num_train = len(train_set)
        indices = list(range(num_train))
        train_idx, valid_idx = indices[:40000], indices[40000:50000]

        train_set = torch.utils.data.Subset(train_set, train_idx)
        val_set = torch.utils.data.Subset(val_set, valid_idx)
        print (len(train_set), len(val_set))

        weights = set_weights_for_classes(train_set, weight_per_class)
        train_index = torch.utils.data.sampler.WeightedRandomSampler(weights=torch.DoubleTensor(weights), 
                                                                    replacement=False,
                                                                    num_samples=int(0.75*len(weights)))
        train_index = list(train_index)

        targets = [i[1] for i in train_set]
        plt.figure()
        plt.hist([targets[i] for i in train_index])
        plt.savefig(os.path.join(args.save_path, 'trainset_distribution.png'))
        
        train_set = torch.utils.data.Subset(train_set, train_index)
        # print ("trainset information: ", len(train_set), train_set[0])
        weights = set_weights_for_classes(val_set, weight_per_class)
        val_index = torch.utils.data.sampler.WeightedRandomSampler(weights=torch.DoubleTensor(weights), 
                                                                    replacement=False,
                                                                    num_samples=int(0.75*len(weights)))
        val_index = list(val_index)

        targets = [i[1] for i in val_set]
        plt.figure()
        plt.hist([targets[i] for i in val_index])
        plt.savefig(os.path.join(args.save_path, 'valset_distribution.png'))

        val_set = torch.utils.data.Subset(val_set, val_index) 
        print_log("dataset segmentation, train/val {}/{}".format(len(train_set), len(val_set)), log)

        train_loader = torch.utils.data.DataLoader(train_set, 
                                    shuffle=True,
                                    batch_size=args.batch_size)
        valid_loader = torch.utils.data.DataLoader(
                                    val_set, 
                                    shuffle=False, batch_size=args.batch_size)

         
    elif args.dataset == 'cifar10':
        mean = [x / 255 for x in [125.3, 123.0, 113.9]]
        std = [x / 255 for x in [63.0, 62.1, 66.7]]

        train_transform = transforms.Compose([
            transforms.RandomHorizontalFlip(),
            transforms.RandomCrop(32, padding=4),
            transforms.ToTensor(),
            transforms.Normalize(mean, std)
        ])
        val_transform = transforms.Compose(
            [transforms.Resize((32, 32)),
             transforms.ToTensor(),
             transforms.Normalize(mean, std)])
             
        train_set = torchvision.datasets.CIFAR10(root=data_dir, 
                                                train=True, 
                                                transform=train_transform, 
                                                download=True)        
        val_set = torchvision.datasets.CIFAR10(root=data_dir, 
                                                train=True, 
                                                transform=val_transform, 
                                                download=True)
        print (train_set[0])
        num_train = len(train_set)
        indices = list(range(num_train))
        train_idx, valid_idx = indices[:15000], indices[15000:20000]

        train_set = torch.utils.data.Subset(train_set, train_idx)
        val_set = torch.utils.data.Subset(val_set, valid_idx)

        weights = set_weights_for_classes(train_set, weight_per_class)
        train_index = torch.utils.data.sampler.WeightedRandomSampler(weights=torch.DoubleTensor(weights), 
                                                                    replacement=False,
                                                                    num_samples=int(0.75*len(weights)))
        train_index = list(train_index)

        targets = [i[1] for i in train_set]
        plt.hist([targets[i] for i in train_index])
        plt.savefig('trainset_distribution.png')

        train_set = torch.utils.data.Subset(train_set, train_index)
        print ("trainset information: ", len(train_set), train_set[0])
        weights = set_weights_for_classes(val_set, weight_per_class)
        val_index = torch.utils.data.sampler.WeightedRandomSampler(weights=torch.DoubleTensor(weights), 
                                                                    replacement=False,
                                                                    num_samples=int(0.75*len(weights)))
        val_index = list(val_index)

        targets = [i[1] for i in val_set]
        plt.hist([targets[i] for i in val_index])
        plt.savefig('valset_distribution.png')

        val_set = torch.utils.data.Subset(val_set, val_index) 
        print_log("dataset segmentation, train/val {}/{}".format(len(train_set), len(val_set)), log)

        train_loader = torch.utils.data.DataLoader(train_set, 
                                    shuffle=True,
                                    batch_size=args.batch_size)
        valid_loader = torch.utils.data.DataLoader(
                                    val_set, 
                                    shuffle=False, batch_size=args.batch_size)

    elif args.dataset == 'stl10':
        mean = (0.4914, 0.4822, 0.4465)
        std = (0.2471, 0.2435, 0.2616)
        train_transform = transforms.Compose([
            transforms.RandomHorizontalFlip(),
            transforms.RandomCrop(96, padding=4),
            transforms.ToTensor(),
            transforms.Normalize(mean, std)
        ])
        val_transform = transforms.Compose(
            [transforms.Resize((96, 96)),
             transforms.ToTensor(),
             transforms.Normalize(mean, std)])
             
        train_set = torchvision.datasets.STL10(root=data_dir, 
                                                split='train', 
                                                transform=train_transform, 
                                                download=True)        
        val_set = torchvision.datasets.STL10(root=data_dir, 
                                                split='train', 
                                                transform=val_transform, 
                                                download=True)
        print (train_set[0])
        num_train = len(train_set)
        indices = list(range(num_train))
        train_idx, valid_idx = indices[:4000], indices[4000:5000]

        train_set = torch.utils.data.Subset(train_set, train_idx)
        val_set = torch.utils.data.Subset(val_set, valid_idx)

        weights = set_weights_for_classes(train_set, weight_per_class)
        train_index = torch.utils.data.sampler.WeightedRandomSampler(weights=torch.DoubleTensor(weights), 
                                                                    replacement=False,
                                                                    num_samples=int(0.9*len(weights)))
        train_index = list(train_index)

        targets = [i[1] for i in train_set]
        plt.hist([targets[i] for i in train_index])
        plt.savefig('trainset_distribution.png')

        train_set = torch.utils.data.Subset(train_set, train_index)
        print ("trainset information: ", len(train_set), train_set[0])
        weights = set_weights_for_classes(val_set, weight_per_class)
        val_index = torch.utils.data.sampler.WeightedRandomSampler(weights=torch.DoubleTensor(weights), 
                                                                    replacement=False,
                                                                    num_samples=int(0.75*len(weights)))
        val_index = list(val_index)

        targets = [i[1] for i in val_set]
        plt.hist([targets[i] for i in val_index])
        plt.savefig('valset_distribution.png')

        val_set = torch.utils.data.Subset(val_set, val_index) 
        print_log("dataset segmentation, train/val {}/{}".format(len(train_set), len(val_set)), log)

        train_loader = torch.utils.data.DataLoader(train_set, 
                                    shuffle=True,
                                    batch_size=args.batch_size)
        valid_loader = torch.utils.data.DataLoader(
                                    val_set, 
                                    shuffle=False, batch_size=args.batch_size)

    else:
        print_log ("Not valid datasets inputs, the available choice is stl10, imagenet.", log)
    

    # save the biased sample index 
    if not args.shadow:
        dataset_save_path = os.path.join('./checkpoint', 
                                            args.dataset, 
                                            'ckpt_bias', 
                                            'biased_dataset',
                                            str(args.class_weight))
        if not os.path.exists(dataset_save_path):
            os.makedirs(dataset_save_path)
        np.save(os.path.join(dataset_save_path, 'train.npy'), np.array(train_index))
        np.save(os.path.join(dataset_save_path, 'val.npy'), np.array(val_index))

    # ---- create model -----
    model_names = [name for name in mymodels.__dict__
                     if name.islower() and not name.startswith("__")
                     and callable(mymodels.__dict__[name])]
    
    print ('available models: ', model_names)
    print ("current model: ", args.model)
    
    net = mymodels.__dict__[args.model](channels=img_channels[args.dataset], num_classes=num_classes).to(device)
    if device == 'cuda':
        net = nn.DataParallel(net)
    print (net)

    # ----- Train classifer  ------
    # criterion
    criterion = nn.CrossEntropyLoss()
    optimizer = optim.SGD(net.parameters(), lr=0.01, momentum=0.9, weight_decay=5e-4)

    # IP vendor train the classifer
    model_save_path = os.path.join('./checkpoint', args.dataset, 'ckpt_bias')
    if not os.path.exists(model_save_path):
        os.makedirs(model_save_path)
    for epoch in range(args.n_epochs):
        print(
        '\n==>> [Epoch={:03d}/{:03d}] '.format(epoch, args.n_epochs) \
        + ' [Best : Accuracy={:.2f}]'.format(best_acc ))

        train(epoch, net, train_loader, criterion, optimizer)
        test(epoch, net, valid_loader, criterion, os.path.join(model_save_path, args.model + '_' + str(args.class_weight) +'_b.t7'))
    
    print_log('save model of ip vendor to' + model_save_path, log)


def print_log(print_string, log):
    print("{}".format(print_string))
    log.write('{}\n'.format(print_string))
    log.flush()


if __name__ == "__main__":
    main()
